# Supplementary material for: β-arrestin 2 Is a Prognostic Factor for Survival of Ovarian Cancer Patients Upregulating Cell Proliferation
Source: PubMed Central journal article supplement (PMC7530235; doi:10.3389/fendo.2020.554733), 2020-09-18
Supplement: Image_1.pdf [file Image_1.pdf]

## Supplementary Material

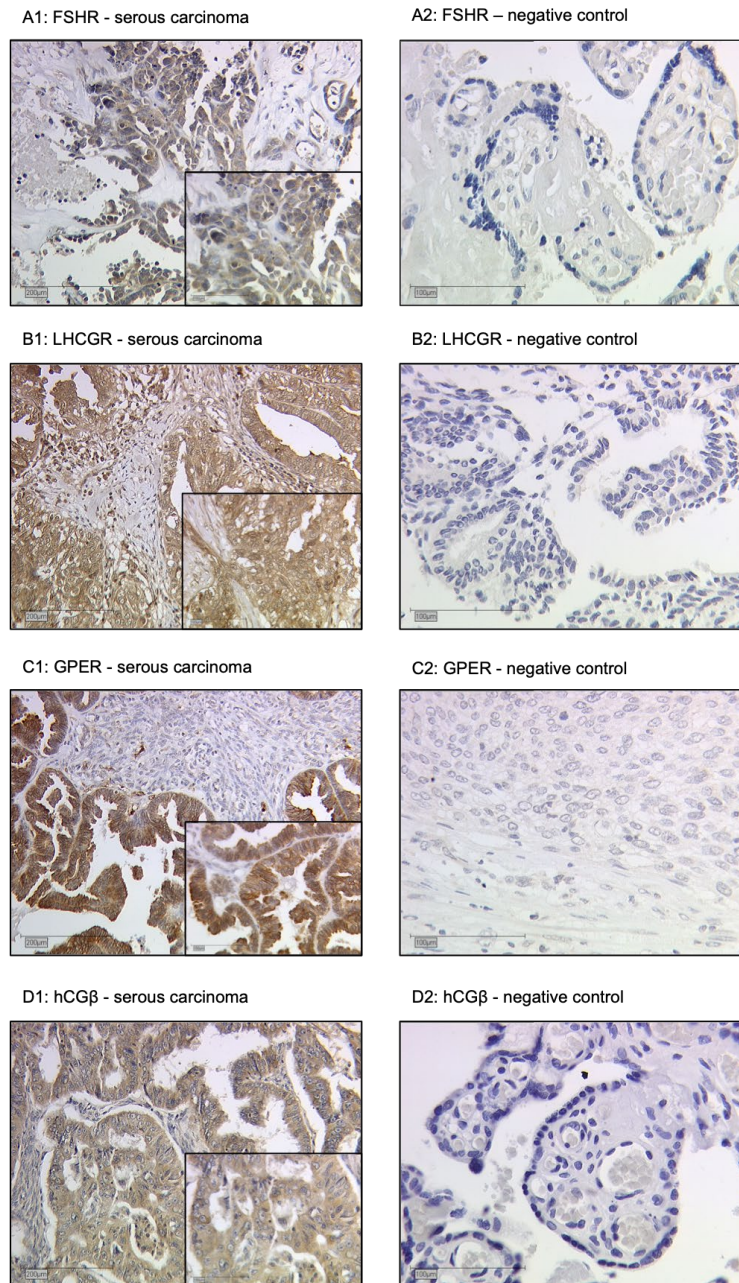

**Supplementary Figure 1.** Detection of FSHR, LHCGR, GPER and hCG $\beta$  with immunohistochemistry. (A1) FSHR, (B1) LHCGR, (C1) GPER, (D1) and hCG $\beta$  in serous ovarian cancer tissue with the corresponding negative controls (A2-D2).
